# Supplementary material for: Direct economic burden of mental health disorders associated with polycystic ovary syndrome: Systematic review and meta-analysis
Source: eLife. 2023 Aug 3;12:e85338. doi: 10.7554/eLife.85338 (PMC10471160; doi:10.7554/eLife.85338)
Supplement: Supplementary file 1. [file elife-85338-supp1.xlsx]

## Sheet: Supplementary File 1
Supplementary File 1. Search terms used for systematic review
Topic	Keywords
	"Polycystic Ovary Syndrome/psychology"[MAJR]”
Mental Disorders in PCOS	‘polycystic ovary syndrome’ AND ‘mental disorder’ OR ‘depression’ OR ‘anxiety’
	‘polycystic ovary syndrome’ AND ‘mental illness’
	(“polycystic ovary syndrome" AND "mental disorder") AND (LIMIT-TO (LANGUAGE, "English"))
	"PCOS" AND "economic burden" OR "costs” OR "cost-of-illness" OR "burden of illness" AND "mental health"
Direct costs for Mental Disorders in PCOS	"PCOS" AND "economic burden" AND "mental health"
	(mental health OR mental illness OR mental disorder OR psych* OR anxiety OR depression OR quality of life OR bulimia OR bipolar disorder) AND ('cost* OR 'economic burden' OR 'cost-of-illness OR 'burden of illness')
Economic burden of Mental Disorders	"Depressive Disorder/economics"[MAJR]
	"Depressive Disorder/economics"[MAJR]
