# Supplementary material for: Direct economic burden of mental health disorders associated with polycystic ovary syndrome: Systematic review and meta-analysis
Source: eLife. 2023 Aug 3;12:e85338. doi: 10.7554/eLife.85338 (PMC10471160; doi:10.7554/eLife.85338)
Supplement: Supplementary file 2. — (a) Characteristics of included studies categorized by anxiety; (b) characteristics of included studies categorized by depression; (c) characteristics of included studies categorized by eating disorders; (d) characteristics of included studies categorized by postpartum depression; and (e) quality scores of studies using Newcastle-Ottawa Scale. [file elife-85338-supp2.xlsx]

## Sheet: Supplementary File 2a
Supplementary File 2a. Characteristics of Included Studies Categorized by Anxiety
Study	Year of Pub.	Country	Study Design	Total Sample Size per Group	Mental Health	PCOS Definition
					Assessment
Alur-Gupta et al.12	2019	US	Case-Control	PCOS= 189	Mental health directly assessed.	Rotterdam criteria.
				Controls= 225
Tan et al.13	2017	China	Case-Control	PCOS= 120	Mental health directly assessed.	Rotterdam criteria,
				Controls= 100
Karjula et al.14	2017	Finland	Population-based Cohort Study	PCOS= 125	Questionnaire-based screening for anxiety and depression symptoms and previously diagnosed/treated depression at ages 31 and 46.	Self-reported PCOS.
				Controls= 2188
Tay et al.15	2020	Australia	Cross-Sectional	PCOS=760	Self-reported data	Self-reported PCOS.
				Controls= 7910
Kaur et al.16	2019	India	Cross-Sectional	PCOS= 73	Mental health directly assessed.	Rotterdam criteria.
				Controls= 78
Asik et al.17	2015	Germany	Cross-sectional	PCOS=71	Mental health directly assessed.	Rotterdam criteria.
				Controls= 50
Cesta et al.18	2016	Sweden	Matched Cohort Design	PCOS= 24385	From diagnoses recorded in national registry	From diagnoses recorded in national registry
				Controls= 243850
Hussain et al.19	2015	India	Case-Control	PCOS=110	Mental health directly assessed.	NIH 1990 criteria.
				Controls=40
Mansson et al.20	2008	Sweden	Case-Control	PCOS= 49	Mental health directly assessed.	Rotterdam criteria.
				Controls= 49
Jedel et al.21	2009	Sweden	Case-Control	PCOS=30	Mental health directly assessed.	Rotterdam criteria.
				Controls=30
Li et al.22	2017	China	observational	PCOS= 103	Mental health directly assessed.	Rotterdam Criteria
				Controls=110
Damone et al.23	2018	Australia	cross sectional analysis	PCOS=478	Mental health directly assessed and self-reported.	Self-reported PCOS
				Controls=8134

## Sheet: Supplementary File 2b
Supplementary File 2b. Characteristics of Included Studies Categorized by Depression
Study	Year	Country	Study Design	Total Sample Size per Group	Mental Health	PCOS Definition
					Assessment
Alur-Gupta et al.12	2019	US	Cross-sectional	PCOS= 189	Mental health directly assessed.	Rotterdam criteria.
				Controls= 225
Hollinrake et al.24	2006	US	Prospective longitudinal study	PCOS= 103	Mental health directly assessed.	Rotterdam criteria.
				Controls= 103
Pastore et al.25	2004	US	Cross-sectional	PCOS= 94	Mental health directly assessed.	NIH 1990 criteria.
				Controls= 96
Tan et al.13	2017	China	Case-control	PCOS= 120	Mental health directly assessed.	Rotterdam criteria.
				Controls= 100
Karjula et al.14	2017	Finland	Population-based follow-up	PCOS= 125	Mental health directly assessed.	Self-reported PCOS.
				Controls= 2188
Tay et al.15	2020	Australia	Cross sectional study	PCOS=760	Self-reported data.	Self-reported PCOS.
				Controls= 7910
Kaur et al.16	2019	India	Cross sectional case control study	PCOS= 73	Mental health directly assessed.	Rotterdam criteria.
				Controls= 78
Asik et al.17	2015	Germany	Cross-sectional	PCOS=71	Mental health directly assessed.	Rotterdam criteria.
				Controls=50
Cesta et al.18	2016	Sweden	Matched cohort design	PCOS= 24385	From diagnoses recorded in national registry.	From diagnoses recorded in national registry.
				Controls= 243850
Cinar et al.26	2011	Turkey	Case control	PCOS= 226	Mental health directly assessed.	Rotterdam criteria.
				Controls=85
Hussain et al.18	2015	India	Case control	PCOS=110	Mental health directly assessed.	NIH 1990 criteria.
				Controls=40
	2008	Sweden	Case-control study	PCOS= 49	Mental health directly assessed.	Rotterdam criteria
Mansson et al.19				Controls= 49
Adali et al.27	2008	Turkey	Case control study	PCOS=42	Mental health directly assessed.	Rotterdam criteria.
				Controls=42
Damone et al.23	2018	Australia	Cross-sectional	PCOS=478	Mental health directly assessed and self-reported.	Self-reported PCOS.
				Controls=8134
Jedel et al.21	2010	Sweden	Case control	PCOS=30	Mental health directly assessed.	Rotterdam criteria.
				Controls=30

## Sheet: Supplementary File 2c
Supplementary File 2c. Characteristics of Included Studies Categorized by Eating Disorders
Study	Year	Country	Study Design	Total Sample Size per Group	Mental Health Assessment	PCOS Definition
Lee et al.28	2015-16	US	Cross-sectional study	PCOS = 148	Mental health directly assessed.	Rotterdam criteria.
				Controls = 106
Hollinrake et al.24	2006	US	Prospective Cohort Study	PCOS= 103	Mental health directly assessed.	Rotterdam criteria.
				Controls= 103
Tay et al.15	2020	Australia	Cross-Sectional	PCOS= 875	Self-reported data.	Self-reported PCOS.
				Controls= 7592
Pirotta et al.29	2019	Australia	Cross-Sectional	PCOS= 501	Mental health directly assessed.	Self-reported PCOS.
				Controls= 398
Kaur et al.16	2019	India	Cross-Sectional	PCOS= 73	Mental health directly assessed.	Rotterdam criteria.
				Controls= 78
Mansson et al.20	2008	Sweden	Case-control	PCOS= 49	Mental health directly assessed.	Rotterdam criteria.
				Controls= 49

## Sheet: Supplementary File 2d
Supplementary File 2d. Characteristics of Included Studies Categorized by Postpartum Depression
Study	Year	Country	Study Design	Total Sample Size per Group	Mental Health	PCOS Definition
					Assessment
Koric et al.30	2021	US	Cases= 320	PCOS= 320	Mental health directly assessed.	Self-reported PCOS.
			Controls= 3586	Controls= 3586
Joham et al.31	2016	Australia	Cross-Sectional	PCOS= 320	Self-reported data.	Self-reported PCOS
				Controls= 4578
Muchanga et al.32	2017	Japan	Population-based Prospective Birth Cohort Study	Cases with postpartum depression= 11,341	Mental health directly assessed.	Self-reported PCOS
				Controls without postpartum depression= 71,148
March et al.33	2018	Australia	Cross-Sectional	PCOS= 52	Mental health directly assessed and self-reported.	Rotterdam criteria.
				Controls= 514
Tay et al.34	2019	Australia	Cross-Sectional	PCOS= 436	Self-reported data.	Self-reported PCOS
				Controls= 4803
Alur-Gupta et al.35	2021	US	Retrospective Cohort Study	PCOS= 42,391	Diagnoses recorded in a United States insurance claims database.	Diagnoses recorded in a United States insurance claims database.
				Controls= 795,480
Fugal et al.36	2022	US	Population-based Study	PCOS= 3,280	Questions in US Pregnancy Risk Assessment Monitoring System Phase 8 questionnaire (2016−2018).	Self-reported symptoms consistent with PCOS or self-reported PCOS.
				Controls= 48,348

## Sheet: Supplementary File 2e
Supplementary File 2e. Quality Scores of Studies Using Newcastle-Ottawa Scale
Study	Selection				Comparability	Outcome			NOS
	Representative-ness of the exposed cohort	Adequate control selection	Adequate end-point definition	Demonstration that outcomes was not present at start of study	Comparability on the basis of the design or analysis	Assessment of outcome	Adequate follow-up duration	Adequate follow-up rate	Overall score
Anxiety
Alur-Gupta et al.12	1	1	1	1	1	1	1	1	8
Tan et al.13	1	1	1	1	0	1	1	1	7
Karjula et al.14	0	1	1	1	1	1	1	1	7
Tay et al.15	1	1	1	1	1	1	1	1	8
Kaur et al.16	1	1	1	1	0	1	1	1	7
Asik et al.17	0	1	1	1	1	1	1	1	7
Cesta et al.18	1	1	1	1	2	1	0	0	7
Hussain et al.19	0	1	1	1	1	1	1	1	7
Mansson et al.20	0	1	1	1	1	1	1	1	7
Jedel et al.21	1	1	1	1	0	1	1	1	7
Li et al.22	1	1	1	1	1	1	1	1	8
Damone et al.23	1	1	1	1	1	1	1	0	7
Mean NOS overall score for Anxiety									7.25
Depression
Alur-Gupta et al.12	1	1	1	1	1	1	1	1	8
Hollinrake et al.24	1	1	1	1	1	1	1	1	8
Pastore et al.25	0	1	1	1	2	1	1	1	8
Tan et al.13	1	1	1	1	0	1	1	1	7
Karjula et al.14	0	1	1	1	1	1	1	1	7
Tay et al.15	1	1	1	1	1	1	1	1	8
Kaur et al.16	1	1	1	1	0	1	1	1	7
Asik et al.17	0	1	1	1	1	1	1	1	7
Cesta et al.18	1	1	1	1	2	1	0	0	7
Cinar et al.26	0	0	1	0	0	1	1	1	4
Hussain et al.19	0	1	1	0	0	0	0	0	2
Mansson et al.20	0	1	1	0	0	1	0	0	3
Adali et al.27	0	0	1	1	0	1	1	0	4
Damone et al.23	1	1	1	1	1	1	1	0	7
Jedel et al.21	0	1	1	0	0	1	1	1	5
Mean NOS overall score for depression									6.13
Eating Disorder
Lee et al.28	1	1	1	1	1	1	1	1	8
Hollinrake et al.24	1	1	1	1	1	1	1	1	8
Tay et al.15	1	1	1	1	1	1	1	1	8
Pirotta et al.29	1	1	1	1	1	1	1	1	8
Kaur et al.16	1	1	1	1	0	1	1	1	7
Mansson et al.20	0	1	1	1	1	1	1	1	7
Mean NOS overall score for eating disorders									7.67
Postpartum Depression
Koric et al.30	1	1	1	1	1	1	1	1	8
Joham et al.31	1	1	1	1	1	1	1	1	8
Muchanga et al.32	1	1	1	1	1	1	1	1	8
March et al.33	0	1	1	1	1	1	1	1	7
Tay et al.34	1	1	1	1	1	1	1	1	8
Alur-Gupta et al.35	1	1	1	1	1	1	1	1	8
Fugal et al..36	0	1	1	1	1	1	1	1	7
Mean NOS overall score for postpartum depression									7.71
