# Supplementary material for: Direct economic burden of mental health disorders associated with polycystic ovary syndrome: Systematic review and meta-analysis
Source: eLife. 2023 Aug 3;12:e85338. doi: 10.7554/eLife.85338 (PMC10471160; doi:10.7554/eLife.85338)
Supplement: Supplementary file 3. — (a) Sensitivity analysis: all studies including self-reported polycystic ovary syndrome (PCOS); (b) sensitivity analysis: excluding studies with self-reported PCOS; and (c) Egger’s test results for assessing funnel plot asymmetry. [file elife-85338-supp3.xlsx]

## Sheet: Supplementary File 3a
Supplemental File 3a. Sensitivity Analysis: All Studies Including Self-Reported PCOS
Outcome	Number of Studies	Estimate	Lower CL	Upper CL	p-value
Anxiety	10	1.42	1.32	1.52	<0.0001
Eating Disorders	6	1.48	1.06	2.05	0.0198
Depression	10	1.65	1.44	1.89	<0.001

## Sheet: Supplementary File 3b
Supplementary File 3b. Sensitivity Analysis: Excluding Studies with Self-Reported PCOS
Outcome	Number of Studies	Estimate	Lower CL	Upper CL	p-value
Anxiety	7	1.47	1.42	1.53	<0.0001
Eating Disorders	4	3.06	1	9.39	0.0509
Depression	7	2.12	1.55	2.91	<0.001

## Sheet: Supplementary File 3c
Supplementary File 3c. Egger's Test Results for Assessing Funnel Plot Asymmetry
Outcome	p-value
Post-partum depression	0.7695
Anxiety	0.0015
Eating Disorders	<0.0001
Depression	0.0004
